# Supplementary material
Source: PubMed Central journal article supplement (PMC8010168)

**SUPPLEMENTARY FIG. 1. Cathepsin L or S cotransfection reduces ACE2 cell surface expression.** (A) Additional gain-of-function experiments performed in HEK293T cells, performed as in Fig. 4A. (B) The relationship between ACE2 cell surface expression and the amount of ACE2 DNA used in each transfection in four gain-of-function experiments is shown. Experiments 1-3 correspond to those in (A), and experiment 4 is presented in Fig. 4A. In experiment 1, as shown, three fixed amounts of ACE2 DNA were used for cotransfections with various cathepsins. In experiments 2-4, higher amount of ACE2 DNA was used when cotransfected with cathepsin L or S to obtain cell surface ACE2 expression comparable to that in cells cotransfected with cathepsin B or vector.

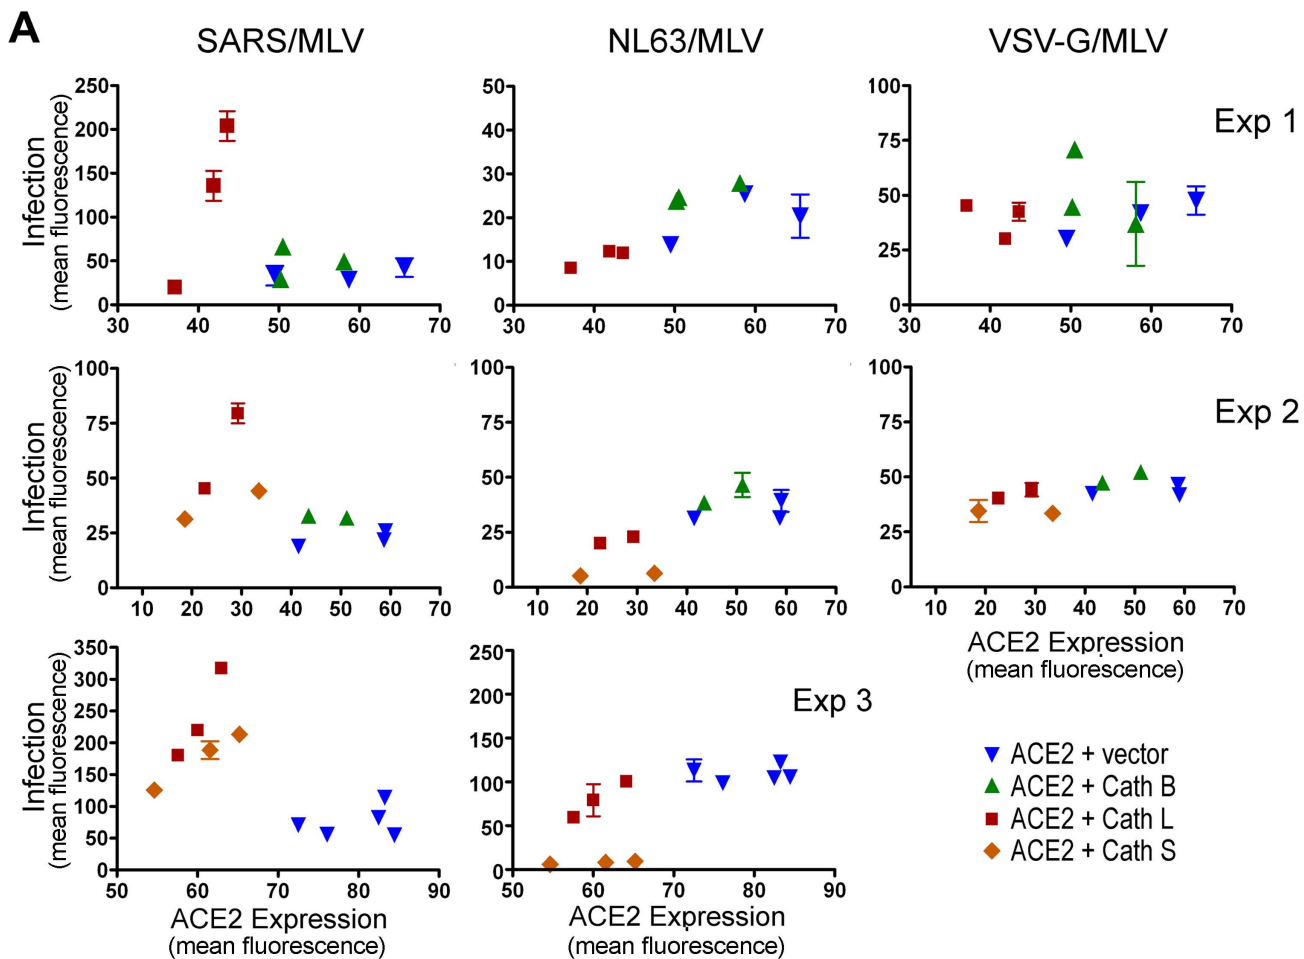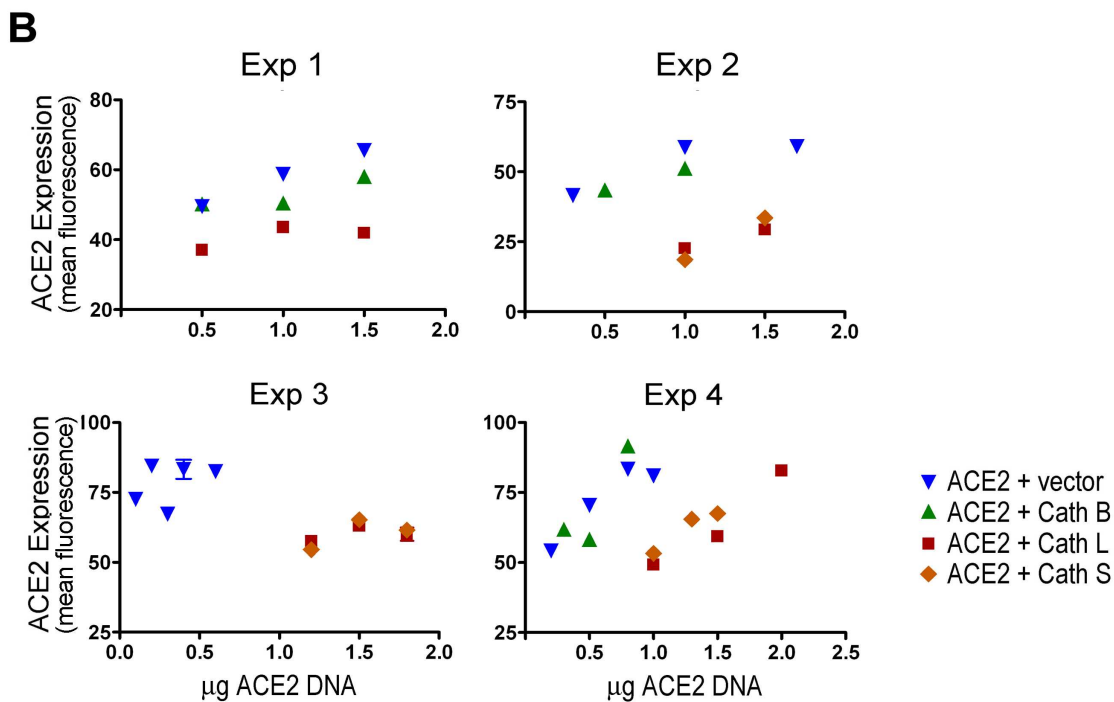

Supplement: mmc1.pdf [file mmc1.pdf]
